# Supplementary material for: The mosquitoes (Diptera: Culidae) of Seychelles: taxonomy, ecology, vectorial importance, and identification keys
Source: PubMed Central journal article supplement (PMC3484020; doi:10.1186/1756-3305-5-207), 2012-09-21
Supplement: 1756-3305-5-207-S2.pdf [file 1756-3305-5-207-S2.pdf]

### The species richness of resident mosquitoes in portions of the south-west Indian Ocean

This additional file presents the data for drawing the Figure 3.

The data sources for species numbers is derived from WRBU ([www.mosquitocatalog.org/](http://www.mosquitocatalog.org/)) that were updated according to published literature. Introduced species that did not succeed to establish permanent functional population(s) (*i.e.* failed early in the colonization process) were not considered. Subspecies were also not considered.

|                               | Anophelinae    |                                | Culicinae     |                                |
|-------------------------------|----------------|--------------------------------|---------------|--------------------------------|
|                               | Nb of species  | Nb of restricted range species | Nb of species | Nb of restricted range species |
| World                         | 478            | 178 (36%)                      | 3043          | 1466 (48%)                     |
| Ethiopian region <sup>a</sup> | 142            | 53 (37%)                       | 662           | 292 (44%)                      |
| Kenya                         | 41             | 7 (10%)                        | 173           | 27 (11%)                       |
| Tanzania                      | 48             |                                | 129           |                                |
| Mozambique                    | 29             |                                | 112           |                                |
| Madagascar                    | 26             | 11 (42%)                       | 212           | 123 (58%)                      |
| Comoros archipelago           | 8              | 1 (12%)                        | 34            | 6 (18%)                        |
| La Réunion                    | 2              | 0                              | 10            | 1 (10%)                        |
| Mauritius                     | 4              | 0                              | 13            | 4 (31%)                        |
| Granitic Seychelles           | 0              | 0                              | 16            | 5 (31%)                        |
| Coralline Seychelles          | 0 <sup>b</sup> | 0                              | 8             | 1 (13%)                        |

<sup>a</sup> Only for species rank; Yemen and Oman excluded

<sup>b</sup> *An. gambiae* excluded as non-resident mosquito
